# Supplementary material
Source: MDPI journal article supplement (https://www.mdpi.com/2304-6740/10/12/233)
Supplement: s1 [file s1]

Supplementary materials

# Layered Gadolinium-Europium-Terbium Hydroxides Sensitised with 4-Sulfobenzoate as All Solid-State Luminescent Thermometers

Anfisa A. Rodina <sup>1,2</sup>, Alexey D. Yapryntsev <sup>1</sup>, Bakhodur A. Abdusatorov <sup>2</sup>, Ekaterina V. Belova <sup>1,2</sup>, Alexander E. Baranchikov <sup>1</sup> and Vladimir K. Ivanov <sup>1,\*</sup>

<sup>1</sup> Kurnakov Institute of General and Inorganic Chemistry, Russian Academy of Sciences, 119991 Moscow, Russia

<sup>2</sup> Faculty of Materials Science, Lomonosov Moscow State University, 119991 Moscow, Russia

\* Correspondence: van@igic.ras.ru

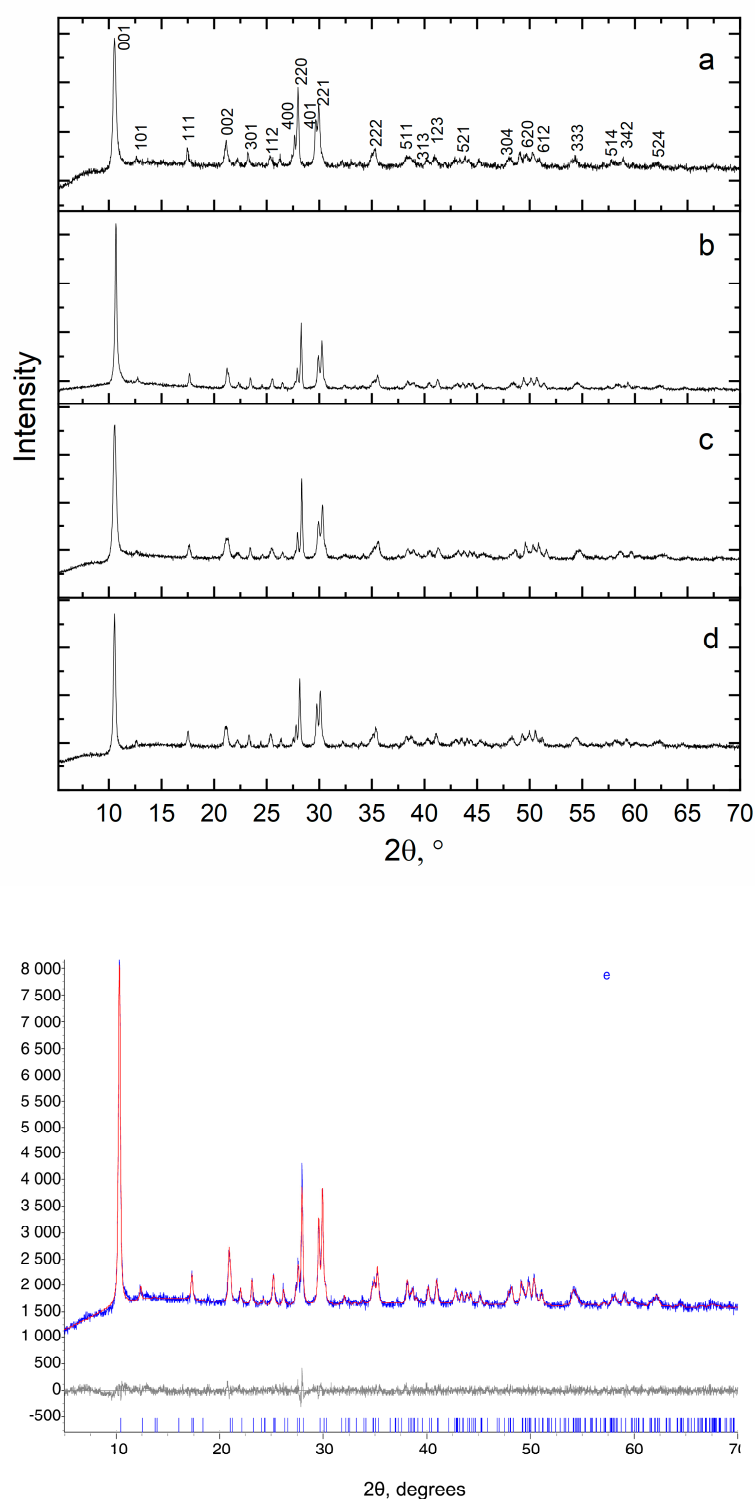

Figure S1. X-ray powder diffraction patterns of the hydrothermal-microwave treatment products of a solutions mixture containing HMT, potassium chloride and (a) europium chloride, (b) gadolinium chloride, (c) terbium chloride and (d) mixtures of solutions of europium, gadolinium and terbium chlorides in a ratio of 1:1:1, respectively. (e) Difference curve, experimental and refined X-ray profiles of the layered basic chloride with the composition  $\text{Gd}_{0.76}\text{Eu}_{0.6}\text{Tb}_{0.64}(\text{OH})_5\text{Cl}\cdot n\text{H}_2\text{O}$ .

**Table S1.** Composition of LRHs and refined  $a$ ,  $b$ ,  $c$  parameters of their crystal lattice.

| $\text{Gd}_{2-x-y}\text{Eu}_x\text{Tb}_y$                | Ln/Cl<br>molar<br>ratio | $a$ , Å   | $b$ , Å  | $c$ , Å  | $V$ , Å <sup>3</sup> | $\langle R \rangle$ , pm | $R_p$ |
|----------------------------------------------------------|-------------------------|-----------|----------|----------|----------------------|--------------------------|-------|
| Gd <sub>2</sub>                                          | 2                       | 12.85(2)  | 7.292(9) | 8.43(2)  | 790(3)               | 105                      | 2.05  |
| Eu <sub>2</sub>                                          | 2.298                   | 12.94(2)  | 7.357(8) | 8.44(2)  | 803(2)               | 107                      | 2.16  |
| Tb <sub>2</sub>                                          | 1.818                   | 12.80(1)  | 7.256(6) | 8.42(1)  | 782(2)               | 104                      | 2.47  |
| Gd <sub>0.12</sub> Eu <sub>1.52</sub> Tb <sub>0.36</sub> | 1.851                   | 12.91(1)  | 7.335(6) | 8.44(1)  | 799(2)               | 106.32                   | 2.12  |
| Gd <sub>0.36</sub> Eu <sub>1.3</sub> Tb <sub>0.34</sub>  | 2.127                   | 12.899(9) | 7.329(5) | 8.46(1)  | 799(1)               | 106.10                   | 2.14  |
| Gd <sub>0.12</sub> Eu <sub>0.98</sub> Tb <sub>0.9</sub>  | 2.127                   | 12.88(1)  | 7.321(6) | 8.44(2)  | 796(2)               | 105.44                   | 2.12  |
| Gd <sub>0.34</sub> Eu <sub>0.9</sub> Tb <sub>0.76</sub>  | 2.173                   | 12.87(1)  | 7.313(5) | 8.45(1)  | 796(1)               | 105.52                   | 2.15  |
| Gd <sub>0.78</sub> Eu <sub>0.9</sub> Tb <sub>0.32</sub>  | 2.040                   | 12.89(1)  | 7.319(5) | 8.45(1)  | 797(2)               | 105.73                   | 2.08  |
| Gd <sub>1.08</sub> Eu <sub>0.6</sub> Tb <sub>0.32</sub>  | 2.083                   | 12.88(1)  | 7.319(6) | 8.45(1)  | 797(2)               | 105.45                   | 2.19  |
| Gd <sub>1.46</sub> Eu <sub>0.25</sub> Tb <sub>0.29</sub> | 2                       | 12.88(1)  | 7.314(6) | 8.45(2)  | 796(2)               | 105.11                   | 2.15  |
| Gd <sub>0.75</sub> Eu <sub>0.31</sub> Tb <sub>0.94</sub> | 1.923                   | 12.85(1)  | 7.291(6) | 8.44(1)  | 791(2)               | 104.86                   | 2.26  |
| Gd <sub>1.18</sub> Eu <sub>0.82</sub>                    | 1.960                   | 12.886(9) | 7.319(5) | 8.45(1)  | 797(1)               | 105.82                   | 1.97  |
| Eu <sub>0.88</sub> Tb <sub>1.12</sub>                    | 1.923                   | 12.83(1)  | 7.300(6) | 8.49(1)  | 796(1)               | 105.33                   | 2.17  |
| Gd <sub>0.1</sub> Eu <sub>0.28</sub> Tb <sub>1.62</sub>  | 2                       | 12.81(1)  | 7.270(6) | 8.42(1)  | 785(1)               | 104.46                   | 2.32  |
| Gd <sub>0.32</sub> Eu <sub>0.04</sub> Tb <sub>1.64</sub> | 1.886                   | 12.827(9) | 7.275(5) | 8.42(1)  | 786(1)               | 104.22                   | 2.29  |
| Gd <sub>0.32</sub> Eu <sub>0.27</sub> Tb <sub>1.41</sub> | 2.173                   | 12.83(2)  | 7.282(7) | 8.42(2)  | 787(2)               | 104.56                   | 2.31  |
| Gd <sub>0.99</sub> Tb <sub>1.01</sub>                    | 2                       | 12.84(1)  | 7.283(6) | 8.44(1)  | 789(2)               | 104.49                   | 2.32  |
| GdEu <sub>0.3</sub> Tb <sub>0.97</sub>                   | 2.040                   | 12.843(9) | 7.285(5) | 8.43(1)  | 789(1)               | 104.55                   | 2.04  |
| Gd <sub>1.01</sub> Eu <sub>0.89</sub> Tb <sub>0.1</sub>  | 2.083                   | 12.885(9) | 7.318(5) | 8.45(1)  | 797(1)               | 105.82                   | 2.01  |
| Gd <sub>1.14</sub> Eu <sub>0.4</sub> Tb <sub>0.46</sub>  | 1.851                   | 12.88(1)  | 7.311(6) | 8.44(1)  | 795(2)               | 105.17                   | 2.03  |
| Gd <sub>1.1</sub> Eu <sub>0.24</sub> Tb <sub>0.66</sub>  | 2                       | 12.86(1)  | 7.299(6) | 8.44(2)  | 792(2)               | 104.92                   | 2.12  |
| Gd <sub>0.36</sub> Eu <sub>1.5</sub> Tb <sub>0.14</sub>  | 1.960                   | 12.93(1)  | 7.339(6) | 8.45(1)  | 801(2)               | 106.42                   | 2.17  |
| Gd <sub>0.7</sub> Eu <sub>1.3</sub>                      | 2                       | 12.91(1)  | 7.330(5) | 8.44(1)  | 799(1)               | 106.40                   | 2.04  |
| Gd <sub>1.5</sub> Eu <sub>0.51</sub>                     | 2.040                   | 12.89(1)  | 7.318(5) | 8.44(1)  | 796(2)               | 105.60                   | 2.01  |
| Gd <sub>0.76</sub> Eu <sub>0.6</sub> Tb <sub>0.64</sub>  | 2                       | 12.865(8) | 7.299(4) | 8.44(1)  | 792(1)               | 105.33                   | 2.12  |
| Tb <sub>1.2</sub> Eu <sub>0.8</sub>                      | 2                       | 12.85(1)  | 7.297(7) | 8.42(2)  | 790(2)               | 105.2                    | 2.11  |
| Tb <sub>0.1</sub> Eu <sub>1.9</sub>                      | 2                       | 12.93(1)  | 7.341(6) | 8.44(1)  | 801(2)               | 106.85                   | 2.35  |
| Tb <sub>1.9</sub> Eu <sub>0.1</sub>                      | 2                       | 12.81(1)  | 7.265(6) | 8.44(1)  | 785(2)               | 104.15                   | 2.02  |
| Tb <sub>0.3</sub> Eu <sub>1.7</sub>                      | 2                       | 12.913(8) | 7.333(4) | 8.443(9) | 800(1)               | 106.55                   | 1.89  |
| Tb <sub>1.7</sub> Eu <sub>0.3</sub>                      | 2                       | 12.822(9) | 7.272(4) | 8.42(1)  | 785(1)               | 104.45                   | 2.08  |

**Table S2.** Composition of LRHs before and after anion exchange

| $\text{Gd}_{2-x-y}\text{Eu}_x\text{Tb}_y$                | Cl/Ln molar ratio | $\text{Gd}_{2-x-y}\text{Eu}_x\text{Tb}_y$ before anion exchange | S/Ln molar ratio | Cl/Ln molar ratio after anion exchange |
|----------------------------------------------------------|-------------------|-----------------------------------------------------------------|------------------|----------------------------------------|
| Eu <sub>2</sub>                                          | 0.44              | Eu <sub>2</sub>                                                 | 0.18             | 0                                      |
| Gd <sub>0.12</sub> Eu <sub>1.52</sub> Tb <sub>0.36</sub> | 0.54              | Gd <sub>0.13</sub> Eu <sub>1.5</sub> Tb <sub>0.37</sub>         | 0.21             | 0                                      |
| Gd <sub>0.36</sub> Eu <sub>1.3</sub> Tb <sub>0.34</sub>  | 0.47              | Gd <sub>0.38</sub> Eu <sub>1.25</sub> Tb <sub>0.27</sub>        | 0.28             | 0.0042                                 |
| Gd <sub>0.36</sub> Eu <sub>1.5</sub> Tb <sub>0.14</sub>  | 0.51              | Gd <sub>0.4</sub> Eu <sub>1.5</sub> Tb <sub>0.1</sub>           | 0.22             | 0.0027                                 |
| Gd <sub>0.7</sub> Eu <sub>1.3</sub>                      | 0.5               | Gd <sub>0.72</sub> Eu <sub>1.28</sub> (OH) <sub>5</sub>         | 0.23             | 0.0042                                 |
| Gd <sub>0.76</sub> Eu <sub>0.6</sub> Tb <sub>0.64</sub>  | 0.5               | Gd <sub>0.76</sub> Eu <sub>0.61</sub> Tb <sub>0.63</sub>        | 0.19             | 0.0049                                 |
| Gd <sub>0.75</sub> Eu <sub>0.31</sub> Tb <sub>0.94</sub> | 0.52              | Gd <sub>0.75</sub> Eu <sub>0.32</sub> Tb <sub>0.93</sub>        | 0.21             | 0                                      |
| Gd <sub>0.78</sub> Eu <sub>0.9</sub> Tb <sub>0.32</sub>  | 0.49              | Gd <sub>0.8</sub> Eu <sub>0.87</sub> Tb <sub>0.33</sub>         | 0.21             | 0                                      |
| GdEu <sub>0.3</sub> Tb <sub>0.97</sub>                   | 0.49              | Gd <sub>0.99</sub> Eu <sub>0.04</sub> Tb <sub>0.97</sub>        | 0.23             | 0                                      |
| Gd <sub>1.01</sub> Eu <sub>0.89</sub> Tb <sub>0.1</sub>  | 0.48              | Gd <sub>1.01</sub> Eu <sub>0.87</sub> Tb <sub>0.12</sub>        | 0.24             | 0.0147                                 |
| Gd <sub>1.1</sub> Eu <sub>0.24</sub> Tb <sub>0.66</sub>  | 0.5               | Gd <sub>1.1</sub> Eu <sub>0.24</sub> Tb <sub>0.66</sub>         | 0.21             | 0                                      |
| Gd <sub>1.08</sub> Eu <sub>0.6</sub> Tb <sub>0.32</sub>  | 0.48              | Gd <sub>1.08</sub> Eu <sub>0.6</sub> Tb <sub>0.32</sub>         | 0.22             | 0.0009                                 |
| Gd <sub>1.13</sub> Eu <sub>0.66</sub> Tb <sub>0.21</sub> | 0.48              | Gd <sub>1.13</sub> Eu <sub>0.66</sub> Tb <sub>0.21</sub>        | 0.23             | 0                                      |
| Gd <sub>1.18</sub> Eu <sub>0.82</sub>                    | 0.51              | Gd <sub>1.19</sub> Eu <sub>0.81</sub>                           | 0.31             | 0.0024                                 |
| Gd <sub>2</sub>                                          | 0.5               | Gd <sub>2</sub>                                                 | 0.25             | 0.0108                                 |
| Tb <sub>2</sub>                                          | 0.47              | Tb <sub>2</sub>                                                 | 0.26             | 0.0089                                 |

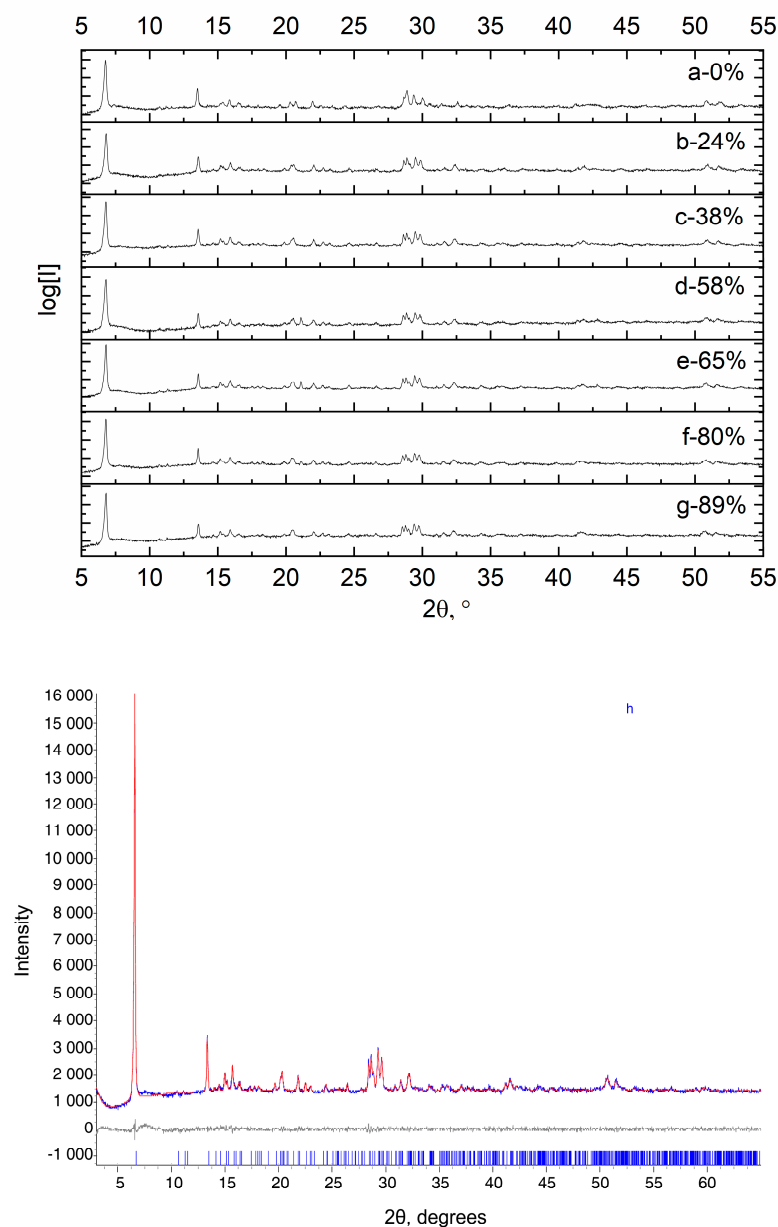

Figure S2. X-ray powder diffraction patterns of  $(\text{Gd}_{1-x}\text{Tb}_{0.9x}\text{Eu}_{0.1x})_3(\text{OH})_7(\text{C}_7\text{H}_4\text{O}_5\text{S}) \cdot n\text{H}_2\text{O}$  (a)  $x = 1$ , (b)  $x = 0.76$ , (c)  $x = 0.62$ , (d)  $x = 0.42$ , (e)  $x = 0.35$ , (f)  $x = 0.2$ , (g)  $x = 0.11$  obtained by homogeneous precipitation in the presence of 4-sulfobenzoate anion and a mixture of gadolinium, europium and terbium chlorides in 0.0:0.1:0.9, 0.150:0.765:0.085, 0.50:0.45:0.05, 0.560:0.396:0.044, 0.630:0.333:0.037, 0.770:0.207:0.023 and 0.90:0.09:0.01 ratios. (h) The difference curve, experimental and refined X-ray diffraction profiles of layered Gd-Eu-Tb basic sulfobenzoates with the composition  $(\text{Gd}_{1-x}\text{Tb}_{0.9x}\text{Eu}_{0.1x})_3(\text{OH})_7(\text{C}_7\text{H}_4\text{O}_5\text{S}) \cdot n\text{H}_2\text{O}$ ,  $x = 0.76$ .

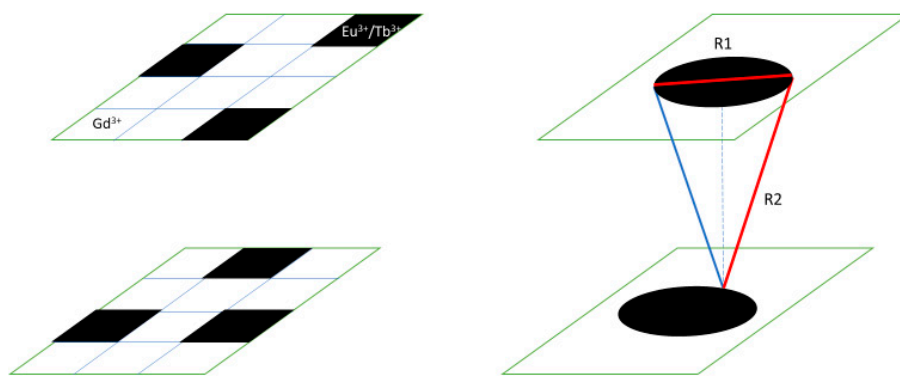

Figure S3. The geometric scheme used to calculate the average distances between the  $\text{Eu}^{3+}$  and  $\text{Tb}^{3+}$  cations in the  $(\text{Gd}_{1-x}\text{Tb}_{0.9x}\text{Eu}_{0.1x})_3(\text{OH})_7(\text{C}_7\text{H}_4\text{O}_5\text{S}) \cdot n\text{H}_2\text{O}$ . Black sectors indicate the area in the layer plane corresponding to  $\text{Eu}^{3+}$  and  $\text{Tb}^{3+}$  cations, and white areas correspond to  $\text{Gd}^{3+}$  cations.

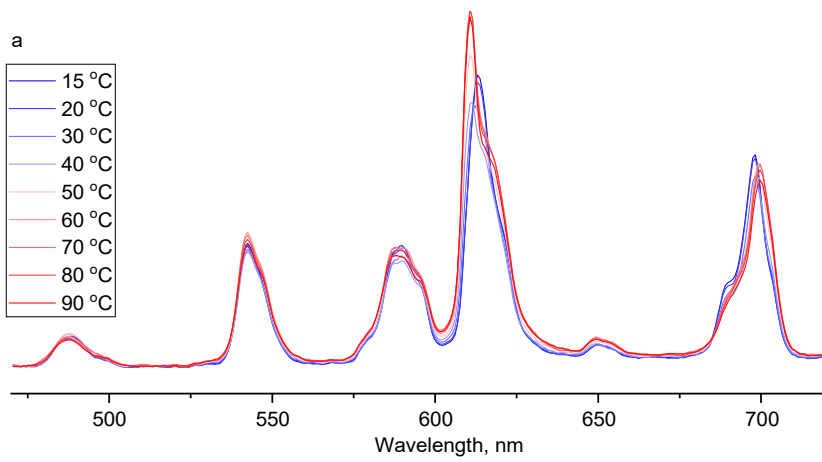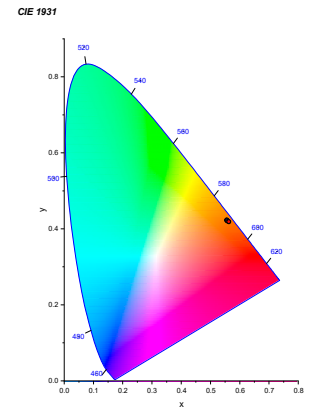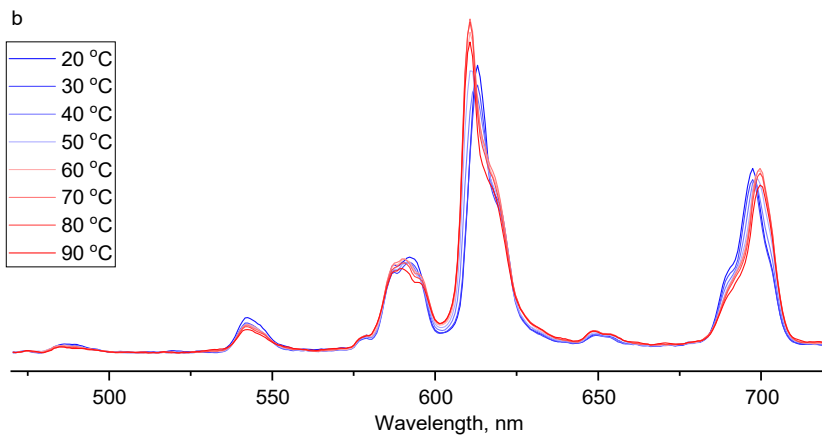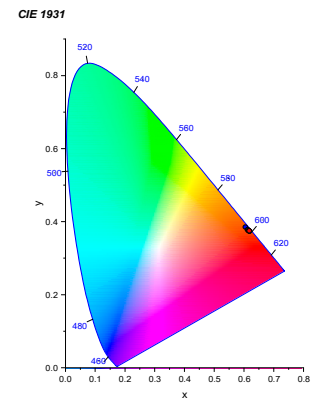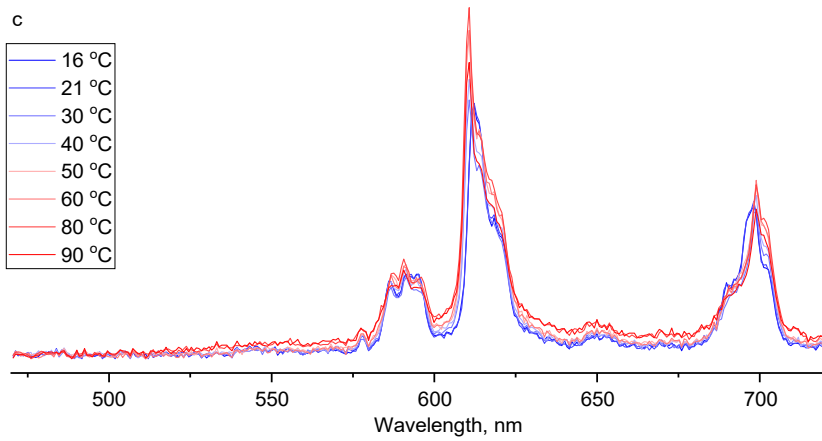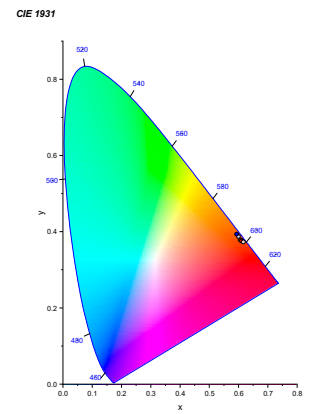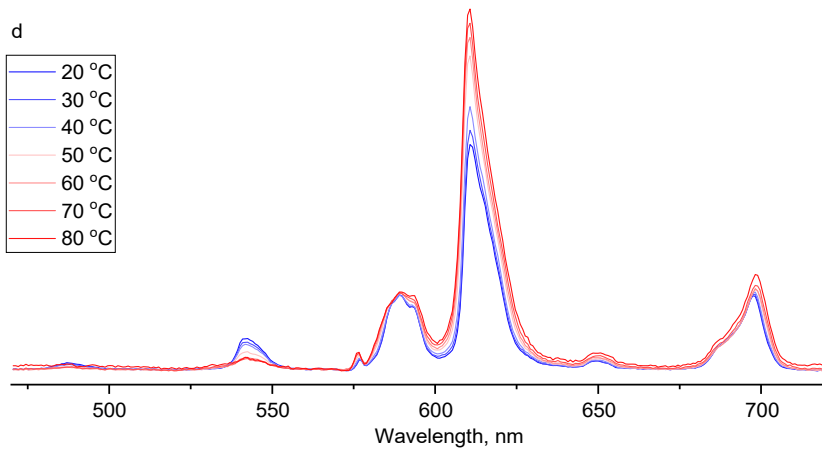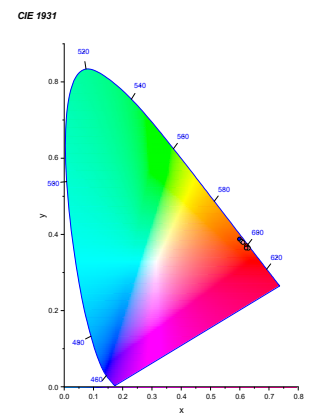

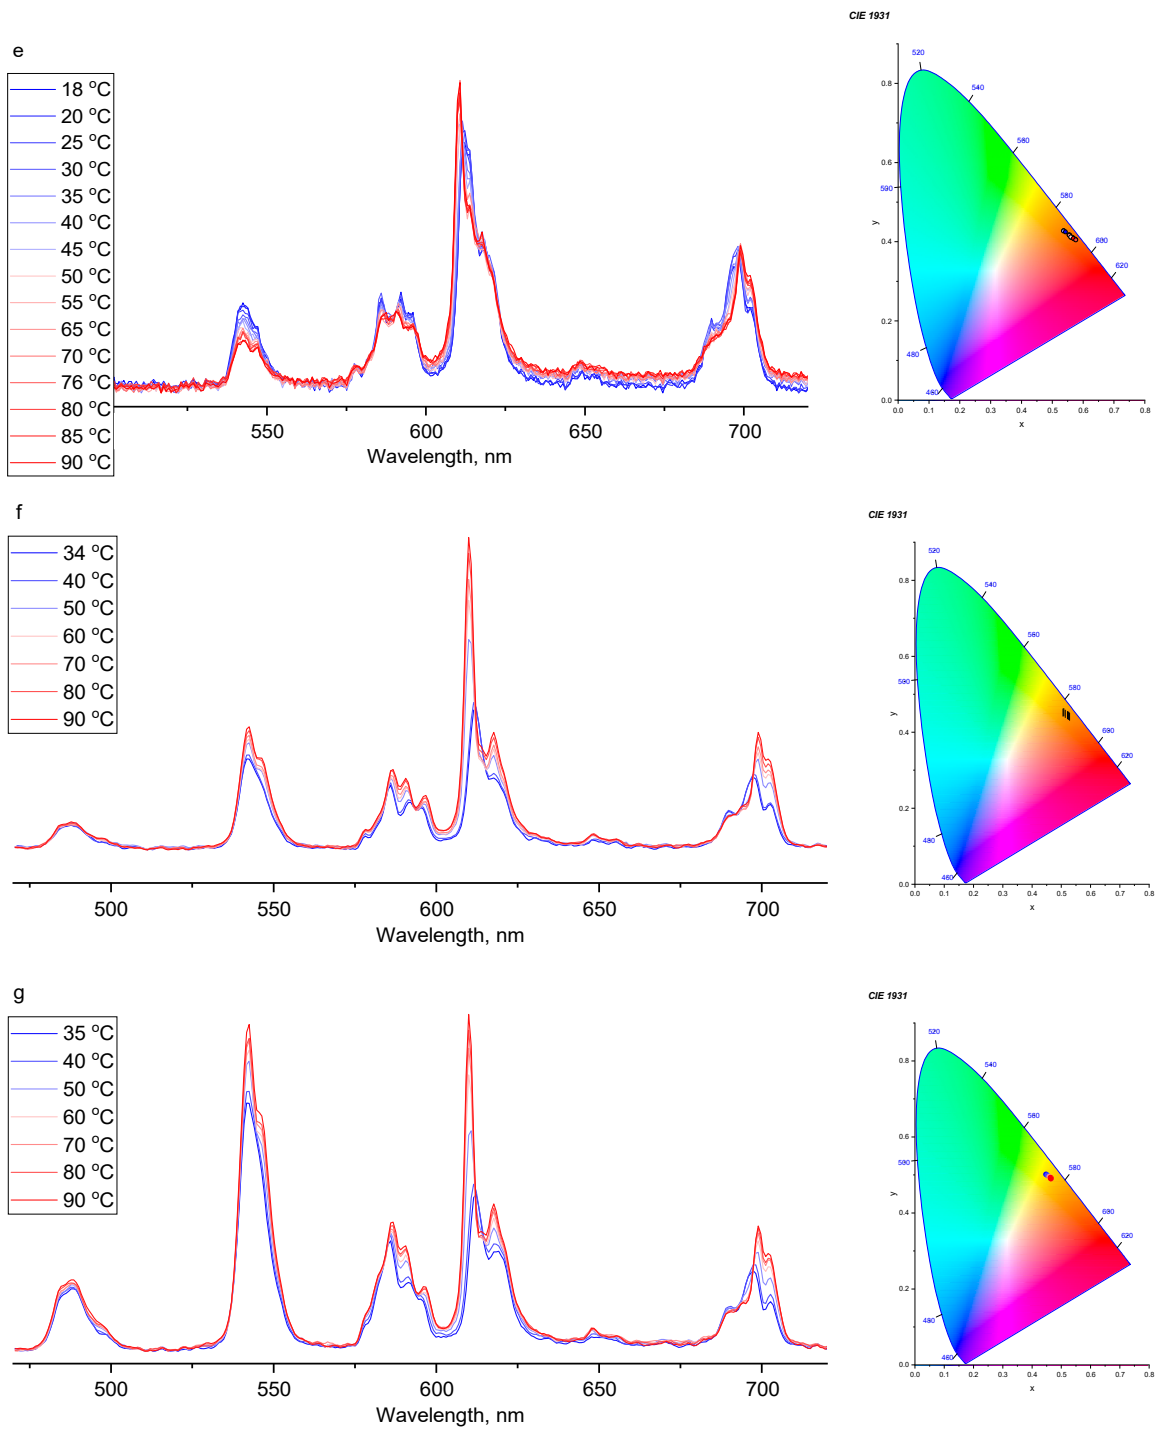



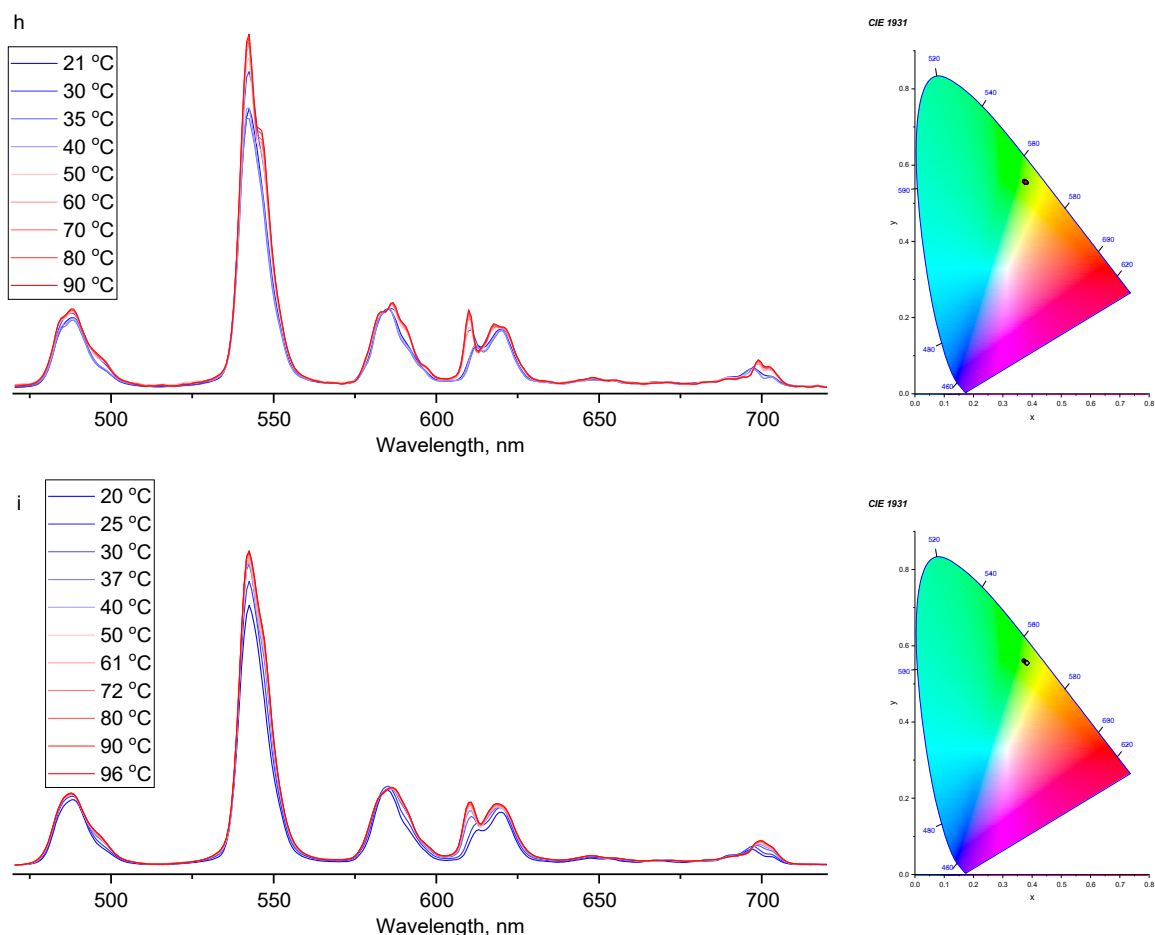

Figure S4. Luminescence spectra at 15–96 °C (left) and corresponding luminescence colour coordinates (right) for the samples:

- (a)  $(\text{Gd}_{0.5}\text{Tb}_{0.48}\text{Eu}_{0.02})_3(\text{OH})_7(\text{C}_7\text{H}_4\text{O}_5\text{S}) \cdot n\text{H}_2\text{O}$ ,
- (b)  $(\text{Gd}_{0.55}\text{Tb}_{0.33}\text{Eu}_{0.12})_3(\text{OH})_7(\text{C}_7\text{H}_4\text{O}_5\text{S}) \cdot n\text{H}_2\text{O}$ ,
- (c)  $(\text{Gd}_{0.54}\text{Tb}_{0.16}\text{Eu}_{0.30})_3(\text{OH})_7(\text{C}_7\text{H}_4\text{O}_5\text{S}) \cdot n\text{H}_2\text{O}$ ,
- (d)  $(\text{Gd}_{0.73}\text{Tb}_{0.14}\text{Eu}_{0.13})_3(\text{OH})_7(\text{C}_7\text{H}_4\text{O}_5\text{S}) \cdot n\text{H}_2\text{O}$ ,
- (e)  $(\text{Gd}_{0.80}\text{Tb}_{0.05}\text{Eu}_{0.15})_3(\text{OH})_7(\text{C}_7\text{H}_4\text{O}_5\text{S}) \cdot n\text{H}_2\text{O}$ ,
- (f)  $(\text{Gd}_{0.58}\text{Tb}_{0.39}\text{Eu}_{0.03})_3(\text{OH})_7(\text{C}_7\text{H}_4\text{O}_5\text{S}) \cdot n\text{H}_2\text{O}$ ,
- (g)  $(\text{Gd}_{0.65}\text{Tb}_{0.33}\text{Eu}_{0.02})_3(\text{OH})_7(\text{C}_7\text{H}_4\text{O}_5\text{S}) \cdot n\text{H}_2\text{O}$ ,
- (h)  $(\text{Gd}_{0.80}\text{Tb}_{0.20}\text{Eu}_{0.01})_3(\text{OH})_7(\text{C}_7\text{H}_4\text{O}_5\text{S}) \cdot n\text{H}_2\text{O}$ ,
- (i)  $(\text{Gd}_{0.89}\text{Tb}_{0.09}\text{Eu}_{0.01})_3(\text{OH})_7(\text{C}_7\text{H}_4\text{O}_5\text{S}) \cdot n\text{H}_2\text{O}$ .

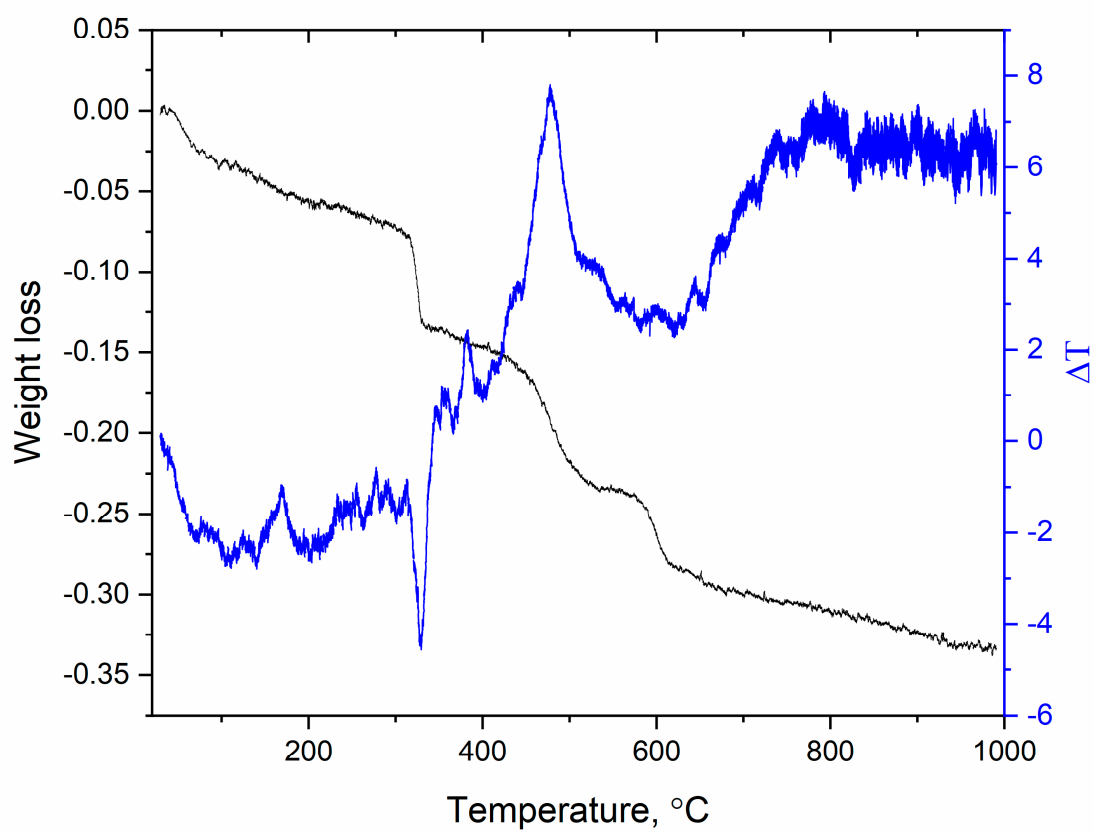

Figure S5. Thermal analysis data for  $(\text{Gd}_{0.65}\text{Tb}_{0.33}\text{Eu}_{0.02})_3(\text{OH})_7(\text{C}_7\text{H}_4\text{O}_5\text{S}) \cdot n\text{H}_2\text{O}$  sample obtained using the single-stage synthesis.

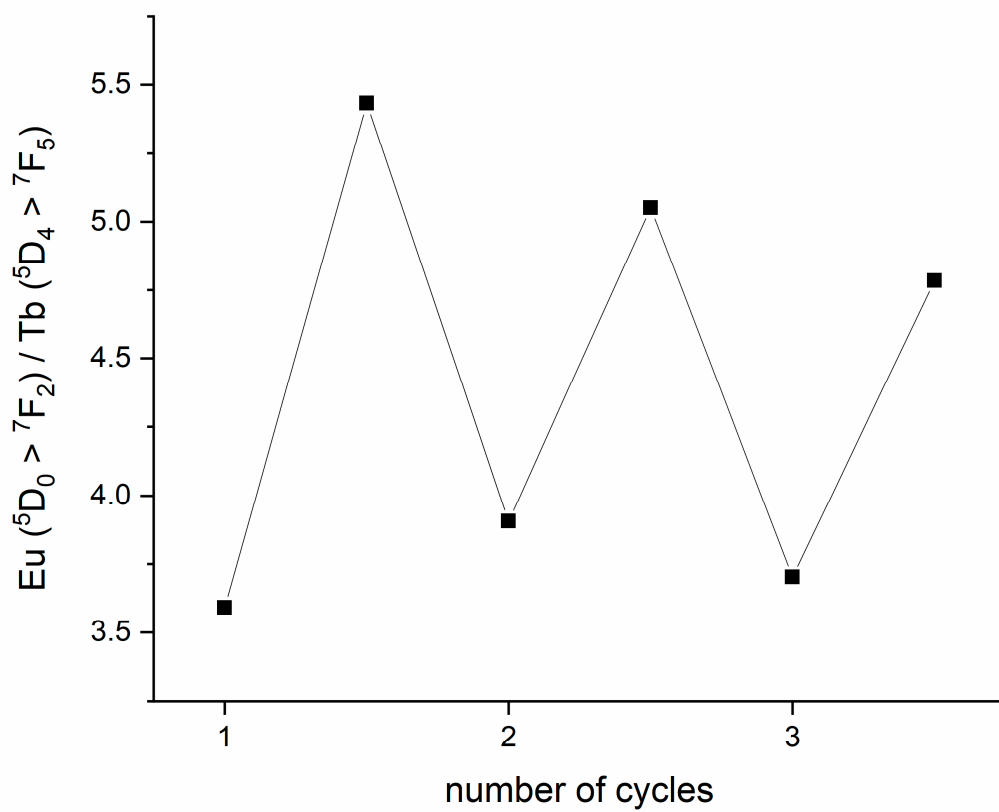

Figure S6. Changes in the intensity ratio  $\text{Eu}(^5\text{D}_0 \rightarrow ^7\text{F}_2) / \text{Tb}(^5\text{D}_4 \rightarrow ^7\text{F}_5)$  of europium and terbium luminescence bands for the  $(\text{Gd}_{0.80}\text{Tb}_{0.05}\text{Eu}_{0.15})_3(\text{OH})_7(\text{C}_7\text{H}_4\text{O}_5\text{S}) \cdot n\text{H}_2\text{O}$  sample during three heating-cooling cycles (25–90°C).
